# Supplementary material for: Continuous versus Cyclic Progesterone Exposure Differentially Regulates Hippocampal Gene Expression and Functional Profiles
Source: PLoS One. 2012 Feb 29;7(2):e31267. doi: 10.1371/journal.pone.0031267 (PMC3290616; doi:10.1371/journal.pone.0031267)
Supplement: Table S2 — Gene expression Ct values. (XLS) [file pone.0031267.s002.xls]

## Sheet: Ct values
Table S2: Gene expression Ct values.
Gene Symbol	Sham_1	Sham_2	Sham_3	Sham_4	OVX_1	OVX_2	OVX_3	OVX_4	OVX+E2_1	OVX+E2_2	OVX+E2_3	OVX+E2_4	OVX+CoP4_1	OVX+CoP4_2	OVX+CoP4_3	OVX+CoP4_4	OVX+CyP4_1	OVX+CyP4_2	OVX+CyP4_3	OVX+CyP4_4	OVX+E2+CoP4_1	OVX+E2+CoP4_2	OVX+E2+CoP4_3	OVX+E2+CoP4_4	OVX+E2+CyP4_1	OVX+E2+CyP4_2	OVX+E2+CyP4_3	OVX+E2+CyP4_4
Group 1
Atp5a1	22.7394	22.5932	23.3914	23.2622	24.7871	24.2204	24.2785	23.8613	24.411	24.1656	24.049	23.2126	23.9449	24.2972	24.2598	23.7909	22.9932	22.8929	22.9154	23.1527	24.3368	24.5106	24.4383	23.286	23.0982	23.3376	22.9189	23.1295
Cox4i1	23.1469	22.9785	23.5815	23.3632	25.1023	24.5614	24.7579	23.907	24.7436	24.5123	24.1312	23.6198	24.2557	24.6149	24.611	23.9186	23.4171	23.3258	23.1204	23.4838	24.5569	24.6	24.4941	23.5908	23.53	23.7199	23.3311	23.269
Cyb5b	28.1047	28.6244	29.1555	29.0254	29.8375	29.2542	29.0244	29.4058	29.0468	29.1917	28.5835	29.8273	29.203	28.9745	29.5126	29.6209	28.8156	28.7722	28.7271	29.2365	28.9159	28.9429	28.8647	29.1868	28.9886	29.7371	28.9533	29.2677
Dnm1l	26.353	26.5333	27.1613	27.1128	27.8869	27.2989	27.3415	27.5219	27.5015	27.3832	27.1443	27.8177	27.3075	27.3805	27.7477	27.6473	26.8926	26.8742	26.5766	26.8565	27.4433	27.5171	27.4246	26.9907	26.8832	27.8293	26.6259	27.311
Gapdh	22.2767	22.7066	23.1365	23.178	23.8565	23.3526	23.3546	23.6385	23.3138	23.0531	23.0521	24.0917	23.142	23.1052	23.9364	23.6102	23.031	22.9307	23.0219	22.719	23.1139	23.0438	23.0599	22.8491	22.9643	24.1074	22.8864	23.272
Hadh	29.0599	29.0937	29.9818	29.9773	30.5187	30.1191	30.3963	30.1905	30.4784	30.3926	29.7627	30.8122	29.9844	30.3562	30.6041	30.4418	29.3323	29.5808	29.1855	29.6401	30.1409	30.5029	30.7007	29.9224	29.7694	30.3785	29.4911	29.6552
Mfn1	28.0151	28.4201	28.8442	28.9293	28.8475	28.6816	28.8993	29.2259	29.0923	28.5095	28.9808	30.017	29.2664	28.9229	29.8437	29.5302	28.666	29.0678	28.3726	28.5219	28.7384	29.097	28.9805	28.923	28.731	29.7834	28.6466	28.7199
Mfn2	27.9123	28.3632	28.5653	28.4197	29.0466	28.7169	28.6979	29.1773	28.6134	28.3206	28.5322	30.0308	29.1901	28.4393	29.7148	29.2994	28.3214	29.0198	28.4225	28.4217	28.5964	28.5021	28.5043	28.6701	28.6792	29.6483	28.5422	28.9999
MT-CO3	17.9305	17.7326	18.3915	18.2197	19.4948	19.3207	19.5595	18.6015	19.604	19.6476	19.2513	17.9748	19.0869	19.3959	19.4459	18.635	18.2761	18.2298	17.9685	17.7808	19.5984	19.5657	19.485	18.0989	18.2907	18.0487	18.0411	18.1884
Nfe2l2	28.9452	28.8697	29.9468	29.7508	30.1611	29.8422	29.8977	30.2193	29.8945	29.8162	29.7284	31.2426	29.7596	30.1354	30.267	30.0452	29.6741	29.8859	29.2543	29.7536	29.5103	30.2306	29.7958	30.1995	29.545	30.4374	29.6914	29.4514
Nrf1	30.5044	31.001	31.2767	31.1542	31.7347	31.5321	31.8326	31.4235	31.4131	31.0106	31.4527	32.38	31.7158	31.9458	32.6029	31.7927	31.1481	31.2532	30.9719	30.9692	31.2495	31.5585	31.4002	31.6428	31.2766	31.9745	31.4712	31.4153
Pdha1	26.0899	26.3622	27.023	27.1237	27.2981	26.8862	26.9298	27.4994	27.0272	26.9521	26.8425	27.9148	26.9429	26.9414	27.5074	27.5977	26.4566	26.9151	26.4803	26.862	26.9373	27.0126	26.873	26.8463	26.8467	27.6381	26.5136	27.0548
Pdhb	26.8389	26.7616	27.5272	27.6447	28.8464	27.7919	27.9357	28.1754	27.9719	27.9965	27.643	28.0116	27.8244	27.941	28.0962	28.289	27.0676	27.2223	26.7658	27.4773	27.8508	27.9054	27.7362	27.3194	27.3251	27.8715	27.0927	27.7087
Polg	31.6353	31.8031	31.6383	32.1973	32.4092	31.5222	31.5788	31.8514	31.4994	31.3537	31.7499	33.1024	32.58	31.5647	32.7216	32.4989	31.7125	32.216	31.6921	32.2591	31.2416	31.4691	31.7318	32.1554	32.4154	32.7672	31.7988	32.0955
Ppargc1a	29.3218	29.3117	30.5476	30.7795	30.924	30.0301	30.1185	31.7038	30.2843	29.9923	30.1692	31.6761	30.2742	30.0588	30.9076	31.0366	30.5595	30.6446	29.9696	30.2138	30.5464	30.4591	30.4299	30.5781	30.1201	31.4263	29.7024	31.0184
Ppargc1b	30.9278	30.7381	31.3325	31.9137	31.421	31.2098	31.1887	31.9085	31.437	30.3224	31.3551	32.8929	31.4	31.1596	32.5644	32.4307	31.5105	32.2792	31.0511	31.1215	31.5452	31.269	31.2982	31.2938	31.4452	32.8129	31.2299	31.9092
Prdx5	24.5097	24.539	24.9859	24.9434	26.3193	25.6537	25.6693	25.656	25.7459	25.5986	25.232	25.6894	25.4343	25.6431	25.7565	25.5007	24.9082	25.0528	24.7919	25.0727	25.7872	25.87	25.8945	25.1895	24.8947	25.7647	24.81	25.135
Sirt1	30.0731	30.1471	31.1976	30.8883	31.9727	31.2653	31.3615	32.115	31.0534	31.074	30.9372	31.85	31.5964	31.3167	31.9885	31.6316	30.759	30.7672	30.4083	30.7	30.9785	31.2808	31.2976	31.2566	30.7981	31.8632	30.6334	30.8056
Slc16a1	29.4567	29.2637	30.3076	30.0505	30.7654	30.2117	30.6374	30.7658	30.09	29.9117	30.0158	31.712	30.1543	30.0571	31.1898	30.8516	29.5908	30.2597	29.8436	30.0052	30.0904	30.4364	30.514	30.1406	29.7668	31.1252	29.7527	30.2677
Slc16a7	27.8812	28.4057	28.9971	28.6588	29.8362	28.9354	29.1168	28.8753	29.4796	29.5034	28.7149	29.081	29.0125	29.2994	29.2281	29.157	28.1841	28.1925	27.8075	28.4465	29.0525	29.3413	29.1594	28.5734	28.5183	28.9418	28.3713	28.8969
Slc25a4	22.7209	22.6561	23.2288	23.1159	24.4998	24.1277	24.2005	23.6125	24.3818	24.0546	23.9128	23.1609	23.5185	24.1947	24.1046	23.617	22.7686	22.8409	22.3971	23.0244	23.9954	24.2045	24.1296	23.1243	22.9479	23.3445	22.8691	22.9621
Slc2a1	28.0732	27.9903	28.2134	28.7546	29.8999	29.0358	28.8184	29.217	28.7044	29.0058	28.4065	30.3529	28.8729	28.5316	29.0986	29.3974	28.333	28.8361	28.3836	29.0242	28.8898	28.4884	28.4243	29.4154	28.4899	29.477	28.8049	28.5532
Slc2a3	28.1817	27.9832	28.6234	28.9483	28.9786	28.6419	28.7215	29.3549	28.8507	28.4568	28.9151	29.8379	28.8428	28.5259	29.7708	29.3637	28.8166	29.1176	28.4771	28.4928	28.9792	28.7041	28.5785	28.7023	28.8178	30.1351	28.4433	29.5234
Sod2	28.1636	28.3635	28.8667	28.6693	29.4107	28.7429	28.6325	29.0411	28.8265	28.4771	28.2751	29.9604	28.8079	28.6853	29.2755	29.204	28.6108	28.5722	28.5874	28.505	28.6203	28.5956	28.6681	28.4206	28.6374	29.6707	28.4903	28.6273
Tfam	28.4152	28.5894	29.3363	29.1892	30.1024	29.5389	29.7182	29.8301	29.9562	29.6035	29.3218	29.6171	29.6497	29.8608	30	29.7844	28.7691	28.9032	28.5811	29.0795	29.5602	29.878	29.784	29.111	29.0771	29.6791	28.8569	29.1502
Group 2
Abca1	29.6418	30.4783	30.883	31.1131	30.4815	30.6601	31.0419	31.2857	30.6525	30.8895	30.1061	32.1525	30.5781	31.1068	31.9934	31.5328	29.7179	31.1322	30.6603	30.684	30.9593	30.4612	30.6802	30.8424	29.8207	31.1314	30.2234	30.9534
Apoe	21.5261	21.5328	22.0245	22.3457	22.7333	22.3737	22.3593	22.4758	22.5893	22.5416	22.1133	23.5328	21.8542	22.4554	22.6709	22.2884	21.8637	21.823	21.6724	21.9051	22.1863	22.2449	22.2	21.8663	21.9369	22.9133	21.7557	21.9837
Capn1	31.9195	31.8431	32.6351	32.3334	33.2994	33.001	33.5855	32.9644	32.7396	32.906	32.7529	34.4515	32.8314	33.9966	33.5745	33.7549	32.3473	33.3818	32.1747	32.5081	32.9671	33.4224	33.294	33.569	32.6838	33.7895	32.4947	32.9931
Cd81	24.2464	24.7207	25.1488	25.2832	25.5472	25.4721	25.3145	25.6972	25.588	25.3647	25.1679	26.8469	25.1919	25.2382	25.6013	25.5449	24.6242	25.0651	24.7976	24.9886	25.2259	25.2999	25.4319	25.1138	24.9649	26.1303	24.5806	24.9608
Cnp	25.9726	27.2633	27.0401	26.5681	27.7193	26.6922	27.1496	27.099	27.0549	27.013	26.2859	29.2298	27.6688	27.0051	27.6153	27.4252	26.59	27.2824	26.4389	26.8798	26.4246	27.0826	27.8237	27.1997	26.7661	27.7355	27.1822	26.2605
Ctsb	24.653	24.7773	25.3537	25.4361	26.1022	25.681	25.6183	25.9705	25.6063	25.6137	25.0984	26.6763	25.576	25.5584	25.825	25.8968	25.0966	25.4954	24.9481	25.4408	25.6149	25.561	25.4917	25.667	25.3243	25.978	25.1476	25.3815
Cyp27a1	32.5885	32.1531	34.8464	33.976	33.9272	34.2575	33.1906	33.4923	33.9057	32.6206	33.299	34.836	33.7253	34.4647	34.5554	35.4713	32.5399	34.787	34.6339	33.0004	33.5128	33.4011	34.0376	34.5351	33.9236	33.8346	32.8486	32.4989
Galc	30.4039	30.8193	31.6159	31.0945	32.0909	31.7199	31.5475	31.8748	32.1932	31.9334	31.7229	32.7347	32.1169	31.826	32.2775	32.1115	31.0306	31.3521	30.7167	31.2955	31.7677	32.0786	31.8715	31.6588	31.1865	31.8945	31.0757	31.418
Gapdh	22.2767	22.7066	23.1365	23.178	23.8565	23.3526	23.3546	23.6385	23.3138	23.0531	23.0521	24.0917	23.142	23.1052	23.9364	23.6102	23.031	22.9307	23.0219	22.719	23.1139	23.0438	23.0599	22.8491	22.9643	24.1074	22.8864	23.272
Lcat	30.3231	29.5512	31.4968	30.9472	30.7995	31.8137	31.2198	32.1004	31.6953	30.7418	31.0768	33.1401	30.4986	31.6996	31.8273	31.5623	30.6452	32.0319	31.5541	30.8973	31.7268	31.243	31.695	31.6744	31.4642	32.9721	30.4985	30.7472
Mbp	22.0856	23.8077	23.3172	22.7175	24.6324	23.3273	24.0558	23.2168	23.8137	23.5282	22.6838	25.3348	24.377	23.6032	23.7922	23.4109	22.8636	23.8206	22.6957	23.6895	22.937	23.5688	24.4079	23.8615	22.9651	23.5305	23.8363	22.3509
Mog	26.4954	27.608	27.5878	26.9536	29.3414	27.9978	28.3908	27.5377	28.3235	28.2999	27.2648	28.6954	28.5641	28.3541	27.8313	27.6528	26.9761	27.6945	26.8871	27.6517	27.7328	28.4185	29.1489	27.8231	27.0073	27.2948	27.7062	26.4861
Nr1h2	30.0006	30.7019	30.9456	30.9191	31.7993	31.1989	31.319	31.5006	31.1976	30.8638	30.6812	33.0396	31.3515	31.2002	31.648	31.5711	30.829	31.09	30.6282	31.1154	30.9006	31.0981	31.1217	31.1405	30.9713	31.8845	30.9071	30.9983
Nr1h3	32.5381	32.1065	33.0611	33.2738	35.3029	33.8278	34.8915	34.0422	33.7206	32.8288	34.2802	34.8126	33.1744	33.9256	34.0712	33.7253	32.7771	34.6042	32.9677	33.2848	34.3191	34.2928	34.5814	33.4465	33.4757	33.9437	32.6817	32.6467
Plp1	23.9684	25.141	25.084	24.3884	26.336	24.953	25.3488	25.0202	25.2734	25.4963	24.5392	26.8203	25.6928	25.2994	25.0888	24.9647	24.3697	25.1154	24.2783	25.1727	24.8791	25.4498	26.3405	25.1659	24.6722	25.5058	25.1104	24.1064
Smpd1	26.9387	27.2119	27.6357	27.5916	28.8825	28.2852	28.128	28.1694	28.2371	28.04	27.659	28.8652	27.9075	28.119	28.0911	28.1955	27.2464	27.7439	27.2132	27.8845	27.975	28.2136	28.0496	27.9827	27.5667	28.6494	27.5078	27.7941
Star	33.1401	33.7575	34.5523	33.7728	35.2083	33.5688	32.3453	35.632	34.8589	33.0061	33.8674	35.2699	33.8855	35.3066	34.9757	35.2899	33.1055	34.1629	33.2683	33.0963	35.1357	33.9874	33.8458	33.9337	33.7264	35.3731	35.4847	34.2124
Tspo	30.7809	30.5011	31.1764	31.6666	32.4225	32.1482	32.2403	31.9693	31.9625	31.9496	31.6057	33.5256	31.8551	32.1923	32.8662	32.1674	31.3137	31.5462	30.8954	31.39	31.8447	32.344	32.7516	31.8822	31.8359	32.1086	31.1988	30.1408
Group 3
A2m	31.6491	31.649	32.0409	32.029	33.8629	32.7066	31.9691	32.9479	32.7796	32.3017	32.1412	33.8471	32.2853	32.2758	33.1836	33.6558	31.8502	33.1179	31.7513	31.9994	32.0727	32.8298	32.177	32.3335	32.3085	33.7425	32.1392	Undetermined
Ace	31.2155	31.6913	31.7276	32.0549	31.8122	31.6543	Undetermined	32.5085	32.0132	31.2146	31.8749	33.3791	32.0768	32.2999	33.5145	32.6488	31.7936	32.2186	30.0602	31.7625	31.4985	31.9963	31.242	32.0099	31.7056	33.0922	31.7209	Undetermined
Adam17	32.0285	32.1596	33.1281	32.7866	32.8642	32.7303	32.8534	33.2586	33.2564	32.8278	32.9725	34.9956	32.7987	33.1478	33.5915	33.8476	32.8527	33.4539	32.6216	32.7419	32.9814	33.2923	33.3144	32.8948	32.457	34.2019	32.7802	32.5094
Apba1	26.9851	27.415	27.6222	28.1525	28.1337	27.6236	27.6339	28.37	27.9853	27.661	27.5314	29.5541	28.0607	27.5262	28.8273	28.6808	27.6823	28.3209	27.5079	27.6935	27.9377	27.9082	27.7384	28.0476	27.7928	29.0859	27.856	28.692
Apba2	26.3012	26.5223	26.8718	27.37	27.4873	27.231	27.0585	27.3589	27.3082	27.0334	27.222	28.3958	27.5202	27.0752	28.1604	27.7424	27.2072	27.5081	26.988	26.6836	27.3996	27.2025	27.0809	26.9475	26.9417	27.9945	26.9236	27.847
Apba3	32.1086	32.2607	32.3267	32.6954	33.5952	33.1452	32.0006	33.3253	33.2351	32.4623	32.4485	35.2533	32.8953	32.2477	34.345	32.8339	32.3707	33.0463	32.3362	32.7269	32.6936	32.7919	32.5649	33.2082	32.9673	34.2682	32.5355	32.7314
Apbb1	27.3692	28.2163	27.9406	28.3993	29.0399	28.4904	27.9531	28.613	28.6089	28.0035	27.9339	30.0926	28.7229	28.1894	28.8013	28.9148	28.0527	28.4687	27.7116	28.4924	28.3882	28.4641	28.1009	28.4345	28.3956	29.4423	28.4718	28.8195
Apbb2	28.5651	29.138	29.4123	29.3478	29.8792	29.725	29.8509	29.4911	29.9151	29.5232	29.4888	30.5132	30.108	29.7014	30.0795	30.0399	29.4886	29.8393	29.128	29.3741	29.8189	30.0733	30.0107	29.8241	29.2814	30.511	29.4694	29.7744
Apbb3	28.6285	28.7044	29.1043	29.1164	30.0474	29.7086	29.9475	29.7188	29.437	29.1493	29.083	30.7312	29.6825	29.7091	29.8591	29.8875	28.8887	29.2336	28.9527	29.2665	29.306	29.8387	29.458	29.3183	29.1771	30.2327	29.4674	29.5323
Apeh	30.794	31.2954	31.1775	31.6835	32.1726	31.3042	31.3574	31.637	31.5385	31.1068	30.9834	33.4144	31.6898	31.4594	32.3359	32.0144	30.8684	31.9466	30.9339	31.2374	31.1072	31.6456	31.0606	31.6143	31.319	32.196	31.6796	31.5429
Aph1a	29.6488	30.0683	30.2561	30.4478	31.2985	30.681	30.4807	31.4537	30.7318	30.3641	30.2104	32.051	31.1218	30.434	30.9964	31.1872	30.3722	30.6913	30.4403	30.5876	30.2571	30.593	30.3622	30.6232	30.5309	31.8981	30.5385	30.6056
App	23.7826	24.1343	24.3649	24.665	25.5438	24.8917	24.7564	24.9691	25.132	24.9246	24.4476	25.7134	25.136	24.9122	25.2807	25.2882	24.3641	24.565	24.0175	24.5504	24.8281	25.0307	24.8415	24.6031	24.4921	25.338	24.5139	24.9464
Bace1	30.5371	30.7876	30.6759	31.3164	31.6915	30.9061	30.6905	31.1539	31.1248	30.525	30.4479	33.4894	31.4921	30.9339	31.5761	31.8949	30.8697	31.2487	30.8027	31.066	30.9106	31.0718	30.7314	31.4103	31.317	32.4131	31.6681	31.5125
Bace2	32.3764	Undetermined	31.7699	33.1574	32.395	31.5888	31.8491	33.4364	31.81	31.7411	32.9925	32.3529	31.5442	31.3231	34.0969	32.8971	31.5218	32.4947	32.2079	30.9706	33.9625	31.7278	32.2735	31.3076	32.1779	33.0541	30.4204	32.5813
Ece1	29.648	29.4567	29.896	30.4103	30.9856	30.6653	30.6986	30.8237	30.5578	29.9353	30.137	31.675	30.9197	30.4856	31.2678	30.8252	30.3121	30.4531	29.9721	29.9301	30.5577	30.812	30.4167	30.5259	30.37	31.3378	30.1151	30.6373
Ece2	30.9111	31.0691	31.2551	31.5168	31.69	31.2396	30.6501	32.3564	30.7733	30.9093	30.7687	Undetermined	30.9371	30.9243	32.9457	32.3592	31.4554	31.8664	31.6083	31.2279	30.9611	30.7279	30.4985	30.9139	31.7468	32.5088	31.464	31.529
Gapdh	22.2339	22.5006	22.7678	22.9133	23.6071	23.1302	22.9611	23.3438	23.1721	22.9935	22.7657	23.9444	23.0971	22.9327	23.6835	23.3405	22.8877	22.8759	22.7075	22.6003	23.2119	22.9789	22.9538	22.8222	22.6483	23.8775	22.6293	23.0285
Igf1	29.9063	29.3956	30.2993	30.5354	32.3228	31.49	31.4099	30.9125	31.7645	31.6233	31.0401	31.3974	31.0413	31.1486	31.2033	30.8997	30.1064	30.2216	29.7881	30.3738	31.2493	31.9414	31.9459	30.703	30.0789	30.9366	30.0418	30.1252
Mme	31.4489	31.8368	32.9035	32.5418	32.9243	32.9366	33.0051	33.5109	33.0461	33.347	32.4074	33.4026	32.832	33.9166	33.1446	33.1673	32.3642	32.6853	31.8882	31.8934	32.9362	33.9721	32.6245	32.8806	32.8319	33.5357	32.8593	33.4951
Mmp2	32.0296	32.2128	32.466	33.5327	33.3656	33.2198	31.6575	32.9195	34.4404	33.844	32.0478	34.048	33.2775	33.0159	34.0354	32.8786	31.625	31.994	31.9482	32.5599	33.0581	32.7192	33.1058	33.0475	32.4404	33.628	32.0099	Undetermined
Mmp9	32.322	32.7026	32.8856	33.7111	34.497	34.0594	32.4404	34.6025	32.5684	34.8891	34.0043	34.8292	33.5733	33.1946	33.8719	33.0861	34.1277	Undetermined	32.7921	32.8464	34.0128	32.8768	33.5593	32.7543	32.5428	33.6246	32.3098	Undetermined
Nae1	28.0235	28.3535	28.7177	28.9999	29.9887	29.1605	29.033	29.4344	29.2875	29.4106	28.6672	29.0513	29.1558	29.6928	29.6437	29.421	28.5497	28.5974	28.3066	28.7989	29.3989	29.7566	29.1382	28.8975	28.3625	29.1712	28.1035	29.2345
Ncstn	28.8985	29.2542	30.1497	29.8012	30.6253	30.1981	29.8977	30.1326	30.062	30.0185	29.5951	31.3727	30.3744	30.0087	31.0263	30.5195	29.6285	30.2176	29.6117	29.7247	30.0768	30.3111	30.0477	30.1849	29.9262	30.6124	29.8447	30.0027
Prep	29.8626	30.0144	30.7223	30.812	31.7144	30.7606	30.6821	31.1847	30.9587	30.8298	30.5831	32.1858	31.1138	30.7505	31.3634	31.4778	30.3342	30.9039	30.2372	30.8772	30.8479	30.8909	30.5506	30.7628	30.7684	32.0352	30.529	31.1681
Psen1	27.949	28.4119	28.7748	28.7454	29.0785	28.3033	28.3156	29.2579	28.8162	28.8544	28.2988	29.9471	29.1384	28.8117	29.3726	29.222	28.4373	28.7442	28.0996	28.6313	28.5094	28.9935	28.4989	28.7655	28.4175	29.6097	28.5306	28.8304
Psen2	30.8185	31.344	31.8943	31.824	31.9841	31.9621	31.6253	32.1046	31.59	31.4063	31.6217	33.3489	32.0504	31.7778	32.3045	32.9201	31.4063	32.2801	31.5885	32.2869	31.8759	32.1098	31.7502	31.8341	31.7611	32.6387	31.6353	32.3939
Psenen	26.513	26.6931	26.9185	26.9152	29.0322	28.3119	28.0197	27.4888	28.449	28.2139	27.6336	27.1305	28.1967	28.5187	27.9679	27.7008	26.9697	26.9925	26.6215	27.1884	28.3663	28.8922	28.2025	27.4671	26.8156	27.1904	27.0002	27.0629
Thop1	28.8348	29.6026	29.493	29.5929	30.8558	30.3574	29.4469	29.75	30.2785	29.764	29.4367	30.7318	30.3165	29.793	31.184	30.4595	29.6765	30.1621	29.4142	29.3346	29.7756	29.9887	29.5992	30.3099	30.0877	30.7772	29.924	30.2565
Timp2	26.1636	25.0485	26.2662	27.0792	26.7276	26.486	26.2715	27.4817	26.5705	26.7094	27.0904	27.555	26.5529	26.3439	27.9418	27.0473	26.4141	26.943	26.6309	25.8262	27.4878	26.5912	26.8671	26.2308	26.476	27.3855	25.4969	26.3098
Ubqln1	27.4117	27.6916	28.211	28.2376	28.9111	28.546	28.3463	28.4458	28.5056	28.1827	27.9598	29.3636	28.5486	28.2865	28.6256	28.6428	27.9438	28.2383	27.7647	27.9466	28.1801	28.573	28.1573	28.1161	27.9571	28.8384	27.9294	28.1782
Group 4
Adrb1	30.0528	30.3996	30.054	30.7424	31.1359	30.8438	30.757	31.0517	30.783	30.3695	30.9252	Undetermined	31.2271	30.458	32.3514	31.3113	30.0087	30.4551	30.125	30.5524	30.3224	30.4552	30.5801	30.7539	30.2908	31.0972	30.2954	31.2456
Adrb2	31.4101	31.2153	32.3728	33.5498	32.5012	31.9285	32.9472	32.7315	32.3787	32.0992	32.4786	30.8626	32.2746	32.6544	33.2071	32.4288	31.92	32.5255	32.6923	32.187	31.9216	32.9983	32.9595	32.3604	31.5871	32.9668	31.4067	32.8457
Ager	32.6511	33.9514	32.5242	33.3159	33.6224	33.5947	34.2202	33.7004	34.1943	33.0317	34.3237	34.1025	33.659	33.9553	35.787	33.8923	33.0961	34.0041	32.7698	33.495	34.3238	33.7302	35.2355	33.3616	33.2225	34.3925	33.2827	33.8401
Alox12	33.2469	35.6967	Undetermined	34.2104	33.7234	32.9312	33.9192	35.114	34.5342	33.7202	33.5044	35.2229	33.3482	35.4232	36.2119	34.0229	33.9994	33.0879	35.4796	33.3415	35.7198	36.9346	36.4002	33.9858	33.9354	33.3354	33.8097	33.3278
Alox5	32.4621	32.6596	33.4504	33.5022	34.3802	34.2491	35.0339	34.9532	34.448	33.9832	32.8006	33.9682	33.3854	34.406	34.172	33.6991	32.9557	33.9338	32.8457	32.7853	33.4368	33.1544	33.2685	33.5161	34.0676	33.6139	33.2434	34.6062
Anxa1	30.9313	Undetermined	31.0725	31.0674	32.0555	32.7552	31.9861	32.3515	31.5116	32.2525	32.6479	31.7114	30.9093	31.9331	31.9198	32.8944	30.9477	31.0261	30.7502	31.1888	32.8024	31.6962	32.6166	31.8009	31.345	30.7527	29.5541	30.908
Anxa3	26.0093	25.9939	26.3749	26.6855	27.6907	27.1953	27.1263	26.7024	27.5287	27.6664	26.8346	26.959	26.8194	27.2155	27.2003	26.9295	26.2139	26.163	25.9971	26.5377	27.1773	27.3219	27.281	26.5079	26.1426	26.5968	25.9956	26.5411
Anxa5	28.2655	27.8679	28.5667	28.9846	29.635	29.4069	29.2435	29.6511	28.969	29.086	28.9463	30.3806	28.8436	29.1364	29.473	29.7409	28.3543	28.5932	28.623	28.8341	29.3622	29.1025	29.4121	28.9184	28.6468	29.365	28.273	28.9321
C1qb	27.4808	27.6529	27.7984	28.3216	28.6772	28.4654	28.3279	28.3638	28.3983	28.3858	27.8981	29.8056	27.8908	28.3336	28.5154	28.2421	27.9308	28.0757	27.9603	27.6799	28.0664	28.2678	28.1866	28.0214	27.8584	28.8843	27.8259	28.1515
C3	29.6332	30.6914	30.7362	30.8377	Undetermined	31.5664	30.274	30.6654	30.9802	30.9397	31.0827	32.6921	31.3066	30.1153	31.1204	30.9718	31.1478	30.7683	30.6496	29.6679	31.1046	30.6674	30.964	30.5847	30.9734	31.5752	29.9218	29.9951
Casp1	30.0328	29.5298	30.329	30.0766	31.4784	30.885	32.0951	30.3502	31.934	32.2841	31.3103	Undetermined	30.8725	31.8949	31.4184	30.65	30.1694	29.9861	30.0064	30.1499	31.5167	31.2247	31.8577	30.0593	30.2064	29.7087	29.7009	30.4906
Cd40	32.0662	32.2492	32.5075	33.7049	33.499	Undetermined	33.165	33.9491	33.923	34.0732	34.8806	33.3849	32.9983	33.1067	33.257	32.2667	33.3262	33.4031	34.1513	32.6689	33.2703	34.224	33.6591	33.6704	Undetermined	33.5048	31.6795	32.2893
Cysltr1	33.8974	33.7441	33.9276	34.9517	35.356	35.0592	34.9555	34.1639	34.5619	34.1493	34.4947	Undetermined	34.2767	34.2306	34.3793	34.8505	34.2994	33.5905	34.6479	34.9279	35.5759	34.8439	35.9383	34.5971	33.7692	35.2851	33.6483	34.8623
Gapdh	21.2331	21.4133	21.485	21.8378	23.2249	22.4011	22.4355	22.4425	22.3582	22.086	22.0271	22.9426	21.9377	21.8514	22.7338	22.3907	21.9151	21.644	21.5538	21.1295	22.2209	22.2625	22.3348	21.8401	21.4877	22.861	21.368	21.9616
Gfap	24.1983	25.2334	25.0054	25.1041	26.3701	25.5014	25.9534	25.3452	25.9697	25.7355	24.9325	27.6411	25.4925	25.3385	25.5576	25.7324	24.7121	24.938	24.4766	25.1743	25.2566	25.0534	25.5452	25.5086	25.0907	26.0616	25.2602	24.6642
Gusb	30.5895	30.2757	31.3181	31.4086	31.9389	32.468	32.0138	32.5263	32.6012	31.2835	31.7075	33.7747	31.7564	32.5607	32.6273	31.5039	30.9934	31.1075	30.844	30.9602	32.4247	32.0789	32.5254	31.423	31.0967	32.1053	31.0777	30.9336
Hpgd	29.8339	29.9242	30.0406	29.9323	33.1859	31.0006	31.1019	30.849	31.0222	Undetermined	30.8788	30.4336	30.9815	31.169	30.731	31.5753	29.9526	29.7703	29.746	30.0701	31.8051	31.5692	31.5952	30.5889	30.7016	30.4358	29.8178	30.8069
Hrh1	29.9427	29.9375	30.685	30.9771	31.9503	31.5063	31.6238	31.7007	31.2184	31.045	30.6878	30.7804	31.1542	30.7449	31.5494	31.8027	29.9872	30.6439	30.6551	30.6134	31.0366	31.2452	30.7095	30.9536	30.8208	31.5953	30.7637	31.1275
Hrh2	29.5511	29.8955	29.8697	30.145	31.2319	30.3315	30.4774	30.8804	30.0625	30.1785	30.1197	29.9806	30.7807	30.0451	31.5703	30.9519	29.6777	30.0153	29.765	30.2836	30.4727	30.5303	30.4035	30.3265	30.2839	30.452	30.0027	30.3384
Hrh3	28.5978	27.8804	28.3616	29.0313	28.9884	29.104	28.4821	29.7604	28.7364	28.7792	29.1887	30.7972	28.9422	28.2317	30.2745	29.5943	29.2596	29.68	28.5394	28.0854	28.6868	29.3363	28.3853	28.2944	28.9253	29.9278	28.0125	29.3001
Icam1	32.1633	31.4818	32.4478	32.3909	32.8104	33.9298	32.4642	32.7881	32.2153	32.4285	32.4884	Undetermined	33.0701	33.4965	32.8546	33.8163	32.1914	32.267	32.643	31.9435	32.3106	31.6059	32.6038	Undetermined	33.0958	34.5995	32.5575	Undetermined
Il1a	32.0718	32.3858	32.5327	33.3129	34.1726	33.2317	34.0866	33.0894	33.9083	33.0571	34.034	32.5769	33.9313	32.9544	33.9229	33.5694	32.7281	32.6526	32.4078	32.1415	33.9589	33.994	34.113	32.8332	32.533	32.5774	31.954	32.7192
Il1r1	31.2577	30.3043	31.6089	33.6489	33.2648	32.8792	32.1762	33.02	31.662	32.6132	32.3095	34.4587	31.9473	32.5327	33.5782	33.8681	31.4508	32.4228	31.8244	32.1482	32.9375	32.3783	33.2173	32.693	32.5367	34.1	31.0896	31.7498
Il1rapl2	30.8296	Undetermined	30.9371	30.9924	30.1785	30.3303	30.6713	31.0866	31.1314	30.6719	31.1368	31.463	31.478	30.6692	32.9007	30.9796	30.2999	29.8547	30.3435	30.2209	31.2866	32.0835	30.5711	30.4547	30.5296	Undetermined	30.0048	30.6562
Il1rl1	32.7886	33.461	Undetermined	34.0303	34.2595	33.7731	34.878	33.3459	34.3005	34.3424	33.5234	33.7512	33.4853	34.74	33.9452	33.9715	33.5545	33.0886	33.6829	33.3374	34.2156	33.7221	33.4194	34.536	32.9704	34.7676	33.3703	33.2942
Il2rg	32.4998	31.3859	33.1274	33.2082	32.7407	32.9295	33.5544	34.125	Undetermined	33.0183	33.3994	33.866	32.4379	33.4845	34.1507	34.1245	31.9358	31.9937	31.9475	32.1491	33.2144	33.3746	33.9037	32.7614	32.9072	35.8416	32.6536	32.4174
Itgal	34.0512	34.6512	34.2816	34.7604	35.6435	33.9767	34.001	34.9369	34.932	35.1535	34.1029	Undetermined	34.2069	34.3943	35.9265	36.8477	34.0196	34.039	33.5293	33.3553	33.9414	34.018	34.3064	35.0711	33.9936	34.2196	33.9271	34.5803
Itgam	29.2165	29.9569	29.9831	30.4337	31.4142	30.7317	30.2823	30.4831	31.114	31.1872	30.9607	31.4746	30.5409	30.198	31.0518	30.4705	30.3896	30.1996	30.3434	29.7864	30.5824	30.5663	30.7856	30.751	30.495	30.6728	29.9169	30.4207
Itgb1	27.4117	27.2347	28.1667	27.9387	28.7142	28.1367	28.4738	28.7022	28.2932	27.7259	28.6805	29.6445	28.3881	28.4217	28.7445	28.9045	27.8067	27.9598	27.8514	28.0016	28.3895	28.1689	28.7566	28.3745	27.8526	28.9566	27.5974	28.221
Itgb2	29.7325	29.6079	29.8176	30.0065	31.3315	30.8839	31.0311	30.3195	31.0228	31.0491	30.1683	30.8315	30.4634	30.5825	30.8983	30.2593	29.8164	29.7065	29.4059	29.309	30.8139	30.9361	30.5065	30.2612	30.0163	29.971	29.4815	29.835
Lta4h	26.747	26.5665	27.1045	26.9416	28.9308	28.2798	28.2676	27.5219	28.5843	28.3251	27.9772	Undetermined	27.8712	28.4142	28.2853	27.6113	27.023	26.7678	26.7146	26.9515	28.2994	28.2841	28.4304	27.2171	26.9557	27.0149	26.8803	26.8744
Ltc4s	31.8601	31.9188	32.2387	32.8181	33.8499	33.8505	32.8298	32.6972	34.2394	33.5614	33.065	32.9879	33.1993	32.4563	32.7545	32.8554	32.437	32.0296	32.1379	32.9425	33.5324	33.1293	33.3562	32.7483	32.1716	32.5974	32.2755	32.505
Mapk1	23.1575	23.1962	23.584	23.6387	25.124	24.4009	24.235	24.3011	24.416	24.3002	24.0789	24.4143	24.2304	24.3086	24.8229	24.3122	23.5758	23.3111	23.3167	23.6182	23.9086	24.2727	24.2664	23.8663	23.6945	24.3506	23.4744	23.9875
Mapk14	27.5793	28.2662	28.1822	28.2858	29.8588	28.8979	28.9616	28.7667	28.9497	28.1894	28.424	29.5786	28.9402	28.7011	29.4852	29.311	28.0518	28.2292	28.0068	28.6097	28.383	28.62	28.9525	28.8591	28.4973	29.0157	28.5856	28.6303
Mapk3	27.9714	28.2842	27.8011	28.6319	29.2905	28.8351	28.9737	29.4426	28.7689	28.7964	28.7255	29.9244	28.7689	28.4894	30.1876	28.828	28.3234	28.2463	28.2889	28.15	28.7632	29.2622	28.7727	28.9723	28.537	29.318	28.2077	29.0943
Mapk8	28.0387	28.4317	28.9655	29.0022	29.2469	28.7918	29.0127	29.5219	29.3979	28.9162	29.3623	29.9362	29.4044	29.0162	30.5629	29.3341	28.5508	28.9792	28.6218	28.2915	28.9414	29.1892	29.3799	28.4947	28.3268	29.3372	28.0822	29.2811
Nfkb1	28.3449	28.8764	28.9229	29.1585	30.5823	29.5307	29.9852	29.4676	30.0949	29.8629	29.5148	29.9416	29.9568	29.8905	30.2295	29.9479	28.9651	29.3749	28.9587	29.687	30.1704	30.0687	29.9685	29.4658	29.1004	29.3439	28.8328	29.0657
Nr3c1	26.1314	26.7649	27.1938	26.9468	28.29	27.4803	27.7074	27.3459	27.8844	27.4871	27.1893	28.4048	27.5046	27.62	27.5607	27.5719	26.7226	26.7028	26.3186	26.727	27.6245	27.3027	27.9472	27.4514	26.698	27.6764	26.994	26.9647
Pde4a	32.2778	33.9177	31.9463	31.3626	33.9577	32.751	33.9778	31.9354	32.6902	32.2152	31.4611	Undetermined	33.0043	33.0712	32.8261	32.3409	32.3982	32.2781	31.6102	32.0696	32.914	32.1808	33.0162	33.6099	32.2533	32.5078	32.9433	31.3392
Pde4b	27.8278	28.0998	28.2603	28.2798	29.8945	29.0038	29.2125	28.9474	28.8265	27.9528	28.4824	29.9648	28.9224	28.7446	29.485	29.0526	28.3336	28.9977	28.1787	28.2462	29.2426	28.8869	28.922	28.3428	28.2214	28.9342	28.2623	28.3934
Pde4d	26.581	27.2348	27.6422	27.5018	28.6194	27.9039	28.2086	27.9445	28.5969	27.795	27.5513	28.9779	28.0722	28.0962	28.1479	28.2169	27.2453	27.3465	26.8614	27.485	28.1588	27.7992	28.4337	27.7011	27.4144	28.1972	27.4428	27.6738
Pla2g1b	32.1158	32.9307	33.6013	31.6168	34.9669	33.998	34.2002	33.3337	34.0938	34.1376	35.0611	33.0107	35.4575	34.2059	35.9512	Undetermined	32.6586	33.0966	32.8143	Undetermined	35.1765	33.4542	34.5969	33.4734	32.8821	33.638	33.5516	31.6802
Pla2g2a	35.7014	Undetermined	34.7786	34.8703	34.9173	33.9614	Undetermined	32.9901	34.3774	34.3408	36.2565	Undetermined	Undetermined	35.3134	34.4913	34.6249	32.9895	33.6222	33.4568	33.8227	35.476	33.616	34.2411	34.2247	33.7335	33.8212	32.4464	32.911
Pla2g7	26.1261	26.3808	26.9061	26.9478	28.5451	27.7585	27.8835	27.0764	28.0311	27.8764	26.8952	27.2683	27.3949	27.9522	27.2508	27.3822	26.1693	26.0923	25.9917	27.08	27.91	27.5744	28.3362	27.1351	26.743	26.4842	27.0335	26.7713
Plcb2	32.8637	33.3527	34.3374	33.7779	33.3465	34.4441	33.7751	34.0641	34.201	34.1711	33.9178	34.8426	34.6371	34.7574	34.9504	34.6729	33.5413	34.3887	33.097	33.2962	34.1391	34.6661	35.685	33.7081	33.9397	34.1224	33.5343	34.3879
Plcb3	30.447	30.8897	30.8817	31.1264	31.7874	32.1358	31.7127	31.9246	31.609	30.6305	31.1254	32.9818	31.4939	31.1939	31.9874	32.3631	30.9498	31.8151	31.1563	31.7278	31.9543	30.9689	31.4022	31.8854	31.3309	32.0183	31.4933	30.9891
Plcb4	29.159	28.987	29.7559	30.1458	31.016	30.159	30.5251	30.3181	30.6381	28.5877	29.9536	30.943	29.4278	30.8371	30.6473	30.4902	30.1123	29.8263	29.8659	29.8872	31.1971	30.5609	30.8995	30.0967	29.9358	30.2756	29.335	29.1975
Plcd1	30.6586	31.2164	31.8857	32.0389	32.6226	31.6982	32.3085	32.0002	32.1372	31.8374	32.1469	33.7218	32.1569	31.8705	32.3949	31.9831	31.276	31.7327	31.3698	31.1222	32.4027	32.0699	31.9927	31.9434	31.1665	32.6493	31.8702	31.3639
Plce1	31.0738	31.9596	31.9651	32.3603	32.747	32.9363	31.7891	32.863	32.2719	32.5253	32.1315	33.9016	32.4902	31.7068	31.9541	33.8495	31.4319	32.1543	31.5186	31.9693	32.4556	31.7707	32.2618	32.6476	31.8308	32.6562	32.2742	31.166
Plcg1	27.0964	27.3128	27.8367	28.0275	28.2749	27.9923	28.1793	28.6369	28.259	27.5658	28.2623	29.7961	28.7611	28.4594	29.3347	28.9622	27.6748	28.034	27.4349	27.9491	28.1225	28.106	28.1921	27.9515	28.1907	28.9729	27.8905	28.141
Plcg2	31.6823	31.3879	31.4648	32.4613	32.7494	32.4683	32.3444	31.8986	33.9701	32.1034	33.3446	33.5079	33.1628	32.5643	32.7296	33.9222	31.6714	31.6908	32.0517	31.7661	31.8322	33.0602	31.953	31.5683	31.7013	33.1097	33.001	32.0697
Ptafr	28.963	29.0511	28.2553	29.5269	30.5383	29.964	30.2423	29.3962	30.9593	30.5752	30.3255	Undetermined	29.9776	30.8063	30.6837	29.0271	29.2958	28.601	28.3313	28.9074	29.9855	30.1067	30.3313	29.314	29.0003	28.987	28.0592	29.6076
Ptger2	32.9952	31.7365	32.7522	34.5568	33.5517	33.6564	33.9841	34.323	32.95	32.7982	33.946	34.1185	32.7641	33.1224	33.9049	34.9122	32.5398	33.111	33.2226	32.2376	33.2902	34.2367	32.8203	32.4421	33.4224	33.1268	32.1141	32.9284
Ptger3	32.4124	31.7587	33.6557	32.5324	Undetermined	33.874	33.9642	34.4541	33.0801	35.1963	33.3086	35.2228	33.0531	32.8997	34.2434	34.103	31.5982	33.2272	32.6902	32.1502	32.7537	34.3811	32.8674	33.4753	33.538	33.8769	31.4672	32.1312
Ptgis	Undetermined	29.9831	30.1813	30.7764	31.4015	30.9983	30.6662	Undetermined	28.7291	30.5664	30.9384	Undetermined	33.4567	Undetermined	32.3573	32.6554	31.1815	29.6657	30.5335	30.7014	29.9745	30.7464	30.8972	Undetermined	31.1181	Undetermined	29.2892	29.7815
Ptgs2	26.6616	27.8455	27.6763	27.816	29.8132	28.2568	28.6344	28.2423	28.8476	28.8986	27.5584	28.9442	28.6414	28.6992	27.98	28.5836	27.4834	27.547	27.1387	27.8558	27.4583	27.9403	28.6087	28.3704	27.9524	28.4482	27.9355	27.9453
Scye1	25.4207	25.7758	26.187	25.8615	27.864	26.9957	27.2044	26.6045	27.2631	27.2036	26.7234	26.5153	26.9826	27.4234	27.5844	26.947	26.0285	25.537	25.77	26.3451	27.1361	27.1867	27.1693	26.2248	25.9632	26.3709	25.4692	25.6711
Tbxa2r	32.8232	33.1007	32.8949	33.5263	34.7146	33.8846	33.9559	35.1964	34.9786	32.8761	35.547	34.6392	33.1839	34.2596	34.7067	34.976	Undetermined	33.7134	32.8388	33.2414	33.9316	33.4009	33.9617	33.6576	33.0954	35.1512	32.96	35.0836
Tbxas1	32.0616	31.5884	31.7857	31.7474	33.4675	32.4496	33.1067	33.6835	33.9377	32.7052	31.8326	33.947	32.4318	33.9082	34.7871	32.7857	32.3542	31.7844	32.6441	32.5348	32.7186	32.6541	32.9515	32.6022	32.2466	33.0402	32.7267	32.3729
Tlr2	30.0248	30.242	30.1253	30.5549	31.7968	31.5029	31.7111	30.4886	31.7275	32.3345	31.0497	Undetermined	30.7999	31.5824	30.9406	30.8353	30.4173	29.4773	29.9542	29.9276	31.5935	31.5631	31.9535	30.2959	30.212	30.3812	29.8985	30.275
Tlr4	32.0003	31.4726	32.3651	33.6296	32.4641	Undetermined	32.3117	32.6568	32.9084	32.1333	32.4211	34.6686	31.9906	32.2143	33.4481	33.1443	32.5072	32.7179	32.2233	31.8182	32.4508	32.2529	33.0927	31.9495	32.9665	33.8877	31.3236	32.4295
Tnfrsf1a	29.1806	28.898	29.2099	29.9176	30.7058	30.2894	30.2342	29.8177	30.3112	29.869	29.6775	31.2596	29.9193	29.9206	30.22	30.266	29.4799	29.5342	29.4894	29.5499	30.1119	30.043	30.4073	30.0517	29.9608	30.8521	29.1138	28.9379
Tnfrsf1b	31.9129	31.1199	31.5094	32.9433	33.5783	32.4141	32.3935	33.0346	32.7662	34.2101	32.417	33.4316	32.643	32.2344	33.1281	33.3149	32.2652	32.3418	32.6302	32.4615	32.0694	32.7407	32.8716	32.0769	32.5994	33.1175	32.2413	32.8881
Vcam1	27.8283	27.485	28.358	28.4717	29.5094	28.8825	28.9426	28.8567	29.3443	28.7589	28.8641	29.1127	28.5183	28.9777	29.2845	28.8092	27.9061	27.9949	27.9733	28.3033	29.0515	29.0923	29.2967	28.4451	27.9625	28.9265	27.7159	28.6872
Group 5
Esr1	33.0768	31.8985	32.5443	34.4261	33.3164	34.2043	33.5672	34.9211	33.5994	33.5805	34.2348	33.6372	33.2862	33.0456	34.114	33.888	33.6912	33.3594	34.8548	32.2934	33.8118	33.0249	33.7531	32.9757	33.5225	35.5077	32.4422	33.8844
Esrra	30.4724	31.139	31.0068	31.4924	32.0625	31.6085	31.4246	31.7231	31.4693	30.5059	30.9301	33.0721	31.7354	31.5164	32.1572	31.964	30.9053	31.659	30.8831	31.4503	31.0898	31.364	31.4059	31.0928	31.7249	32.1989	31.4149	31.5142
Esrrb	34.5865	34.6555	35.3445	34.8197	35.7386	35.509	34.9501	34.6612	35.0553	34.3948	33.8606	35.7853	35.7671	35.7966	35.7459	35.1087	35.6693	35.7883	34.6901	34.3969	35.5592	35.7312	35.366	35.8006	35.7577	35.032	34.6018	34.9229
Gapdh	22.2339	22.5006	22.7678	22.9133	23.6071	23.1302	22.9611	23.3438	23.1721	22.9935	22.7657	23.9444	23.0971	22.9327	23.6835	23.3405	22.8877	22.8759	22.7075	22.6003	23.2119	22.9789	22.9538	22.8222	22.6483	23.8775	22.6293	23.0285
Gper	32.2071	32.6255	33.1472	33.2037	34.14	33.7145	32.995	34.3094	33.6664	32.8462	33.9451	33.5144	34.0414	34.1424	34.0798	34.9722	32.7163	33.1854	33.2595	32.9723	33.2527	34.4351	33.519	33.5817	33.3852	33.839	33.2654	33.7071
Pgr	28.6043	29.1387	29.1806	29.896	29.6867	29.3508	29.3221	29.7198	29.7311	29.5014	29.6746	30.694	29.8874	29.3998	30.2473	30.134	29.4886	29.9047	29.0237	29.1412	29.7942	29.8822	29.613	29.5692	29.1024	29.9966	29.2877	29.8057
Pgrmc1	25.4497	25.1753	25.8388	26.2938	26.959	26.5608	26.2468	26.7725	26.5853	26.7389	26.3532	26.4389	26.3429	26.3382	26.6587	26.6172	25.8987	25.8662	25.5931	25.882	26.8289	26.5807	26.4643	25.9869	25.5482	26.5635	25.1521	26.1926
Pgrmc2	25.3208	25.1645	25.7529	26.3018	26.5371	25.8713	25.9541	26.2768	26.2746	25.6479	25.8824	26.8514	26.3554	26.2181	26.7114	26.2126	25.7964	25.6856	25.3479	25.4559	26.1787	26.0796	25.8101	25.6253	25.4808	26.6752	25.4232	26.004
